# Supplementary material
Source: PubMed Central journal article supplement (PMC10649312)
Supplement: NIHMS1754653-supplement-1.pdf [file NIHMS1754653-supplement-1.pdf]

Supplemental Digital Content 1: Table. List of NSI-22 items in each subscale based on work by Meterko et al.

| <b>Vestibular</b>         | <b>Somato-sensory</b>                     | <b>Cognitive</b>                                                   | <b>Affective</b>                                                 | <b>None (Orphan Items)</b>             |
|---------------------------|-------------------------------------------|--------------------------------------------------------------------|------------------------------------------------------------------|----------------------------------------|
| Feeling dizzy             | Headaches                                 | Poor concentration, can't pay attention, easily distracted         | Fatigue, loss of energy, getting tired easily                    | Hearing difficulty                     |
| Loss of balance           | Nausea                                    |                                                                    |                                                                  | Loss of appetite or increased appetite |
| Poor coordination, clumsy | Vision problems, blurring, trouble seeing | Forgetfulness, can't remember things                               | Difficulty falling or staying asleep                             |                                        |
|                           | Sensitivity to light                      |                                                                    | Feeling anxious or tense                                         |                                        |
|                           | Sensitivity to noise                      | Difficulty making decisions                                        | Feeling depressed or sad                                         |                                        |
|                           | Numbness or tingling on parts of my body  | Slowed thinking, difficulty getting organized, can't finish things | Irritability, easily annoyed                                     |                                        |
|                           | Change in taste and/or smell              |                                                                    | Poor frustration tolerance, feeling easily overwhelmed by things |                                        |

Supplemental Digital Content 2. Table. Full logistic regression results estimating the association between Neurobehavioral Symptom Inventory (NSI) subscale scores and group membership (Table 3 of main paper).

| Variable     | Category                     | Severe or Very Severe Symptoms<br>(Average Scaled NSI Score $\geq 3.0$ ) |                   |                   |                   |                   |
|--------------|------------------------------|--------------------------------------------------------------------------|-------------------|-------------------|-------------------|-------------------|
|              |                              | Vestibular                                                               | Somato-sensory    | Cognitive         | Affective         | Interference      |
|              |                              | OR<br>(95%CI)                                                            | OR<br>(95%CI)     | OR<br>(95%CI)     | OR<br>(95%CI)     | OR<br>(95%CI)     |
| Latent Group | Moderately Healthy           | 1.0<br>(Ref)                                                             | 1.0<br>(Ref)      | 1.0<br>(Ref)      | 1.0<br>(Ref)      | 1.0<br>(Ref)      |
|              | Moderately Healthy + Decline | 2.1*<br>(1.8-2.4)                                                        | 2.0*<br>(1.8-2.3) | 2.0*<br>(1.9-2.1) | 2.2*<br>(2.0-2.3) | 1.9*<br>(1.8-2.0) |
|              | Polytrauma + Improvement     | 1.2<br>(1.0-1.4)                                                         | 1.2<br>(1.1-1.4)  | 1.2*<br>(1.2-1.3) | 1.3*<br>(1.2-1.4) | 1.3*<br>(1.3-1.4) |
|              | Polytrauma Phenotype         | 2.9*<br>(2.6-3.3)                                                        | 2.9*<br>(2.6-3.3) | 3.0*<br>(2.9-3.2) | 3.6*<br>(3.4-3.8) | 2.8*<br>(2.7-3.0) |
|              | Mental Health                | 1.5*<br>(1.3-1.7)                                                        | 1.5*<br>(1.4-1.8) | 2.1*<br>(2.0-2.3) | 2.6*<br>(2.5-2.8) | 2.1*<br>(2.0-2.2) |
| Age at CTBIE | 19-29                        | 1.0<br>(Ref)                                                             | 1.0<br>(Ref)      | 1.0<br>(Ref)      | 1.0<br>(Ref)      | 1.0<br>(Ref)      |
|              | 30-39                        | 1.3*<br>(1.2-1.5)                                                        | 1.6*<br>(1.4-1.7) | 1.2*<br>(1.2-1.3) | 1.3*<br>(1.3-1.4) | 1.2*<br>(1.2-1.2) |
|              | 40-49                        | 1.6*<br>(1.4-1.8)                                                        | 1.9*<br>(1.7-2.1) | 1.2*<br>(1.1-1.3) | 1.2*<br>(1.1-1.2) | 1.0<br>(0.9-1.0)  |

|                        |                            |                   |                   |                   |                   |                   |
|------------------------|----------------------------|-------------------|-------------------|-------------------|-------------------|-------------------|
|                        | 50-59                      | 2.3*<br>(1.9-2.8) | 2.2*<br>(1.8-2.7) | 1.3*<br>(1.2-1.5) | 1.3*<br>(1.2-1.5) | 1.1<br>(1.0-1.2)  |
|                        | 60-69                      | 2.4†<br>(1.4-4.2) | 2.3†<br>(1.2-4.2) | 1.2<br>(0.9-1.6)  | 1.4<br>(1.1-1.9)  | 0.9<br>(0.7-1.2)  |
| Sex                    | Male                       | 1.0<br>(Ref)      | 1.0<br>(Ref)      | 1.0<br>(Ref)      | 1.0<br>(Ref)      | 1.0<br>(Ref)      |
|                        | Female                     | 1.5*<br>(1.3-1.8) | 1.7*<br>(1.5-2.0) | 1.3*<br>(1.2-1.4) | 1.3*<br>(1.2-1.4) | 1.2*<br>(1.2-1.3) |
| Educational attainment | Less than high school      | 1.3<br>(0.9-1.7)  | 1.2<br>(0.9-1.6)  | 1.2†<br>(1.1-1.4) | 1.1<br>(1.0-1.3)  | 1.1<br>(1.0-1.3)  |
|                        | High school or equivalent  | 1.0<br>(Ref)      | 1.0<br>(Ref)      | 1.0<br>(Ref)      | 1.0<br>(Ref)      | 1.0<br>(Ref)      |
|                        | Some college               | 1.1<br>(1.0-1.2)  | 1.0<br>(0.9-1.1)  | 1.0<br>(0.9-1.0)  | 1.0<br>(0.9-1.0)  | 1.0<br>(0.9-1.0)  |
|                        | College graduate or higher | 1.1<br>(0.9-1.3)  | 1.0<br>(0.8-1.2)  | 0.9<br>(0.8-1.0)  | 0.9†<br>(0.8-0.9) | 0.9<br>(0.8-1.0)  |
|                        | Unknown                    | 1.1<br>(0.6-2.1)  | 1.1<br>(0.6-2.0)  | 1.6†<br>(1.2-2.1) | 1.5<br>(1.1-1.9)  | 1.5†<br>(1.2-2.0) |
| Marital status         | Married                    | 1.0<br>(Ref)      | 1.0<br>(Ref)      | 1.0<br>(Ref)      | 1.0<br>(Ref)      | 1.0<br>(Ref)      |
|                        | Not married                | 1.1<br>(1.0-1.2)  | 1.1<br>(1.0-1.1)  | 1.1*<br>(1.1-1.2) | 1.1†<br>(1.0-1.1) | 1.1†<br>(1.0-1.1) |
| Race/ ethnicity        | White                      | 1.0<br>(Ref)      | 1.0<br>(Ref)      | 1.0<br>(Ref)      | 1.0<br>(Ref)      | 1.0<br>(Ref)      |

|                |                                      |                   |                   |                   |                   |                   |
|----------------|--------------------------------------|-------------------|-------------------|-------------------|-------------------|-------------------|
|                | Black                                | 1.8*<br>(1.6-2.0) | 2.1*<br>(1.9-2.3) | 1.2*<br>(1.1-1.2) | 1.5*<br>(1.4-1.5) | 1.3*<br>(1.2-1.3) |
|                | Asian                                | 1.3<br>(1.0-1.7)  | 1.6†<br>(1.2-2.1) | 1.1<br>(1.0-1.3)  | 1.0<br>(0.9-1.2)  | 1.0<br>(0.9-1.1)  |
|                | Native American/<br>Pacific Islander | 1.3<br>(0.9-1.7)  | 2.1*<br>(1.6-2.6) | 1.2<br>(1.0-1.3)  | 1.1<br>(1.0-1.3)  | 1.4*<br>(1.2-1.6) |
|                | Hispanic                             | 1.4*<br>(1.2-1.5) | 1.6*<br>(1.4-1.8) | 1.1*<br>(1.1-1.2) | 1.2*<br>(1.1-1.3) | 1.1*<br>(1.1-1.2) |
|                | Unknown                              | 1.0<br>(0.6-1.6)  | 0.6<br>(0.3-1.2)  | 0.9<br>(0.7-1.1)  | 1.0<br>(0.9-1.3)  | 1.0<br>(0.8-1.2)  |
| Service branch | Air Force                            | 1.2<br>(1.0-1.5)  | 1.0<br>(0.8-1.2)  | 0.9<br>(0.8-1.0)  | 1.0<br>(0.9-1.1)  | 1.0<br>(0.9-1.1)  |
|                | Army                                 | 1.0<br>(Ref)      | 1.0<br>(Ref)      | 1.0<br>(Ref)      | 1.0<br>(Ref)      | 1.0<br>(Ref)      |
|                | Coast Guard or Navy                  | 0.9<br>(0.8-1.1)  | 0.9<br>(0.8-1.1)  | 0.9†<br>(0.8-1.0) | 0.9<br>(0.8-1.0)  | 1.0<br>(0.9-1.1)  |
|                | Marine Corps                         | 1.0<br>(0.8-1.1)  | 0.9<br>(0.8-1.1)  | 0.9*<br>(0.8-0.9) | 0.9*<br>(0.8-0.9) | 0.9†<br>(0.9-1.0) |
| Component      | Active duty                          | 1.0<br>(Ref)      | 1.0<br>(Ref)      | 1.0<br>(Ref)      | 1.0<br>(Ref)      | 1.0<br>(Ref)      |
|                | National Guard or<br>Reserve         | 1.0<br>(0.9-1.1)  | 1.0<br>(0.9-1.1)  | 1.0<br>(1.0-1.1)  | 1.0<br>(0.9-1.0)  | 1.0<br>(1.0-1.1)  |
| Rank           | Enlisted                             | 1.0<br>(Ref)      | 1.0<br>(Ref)      | 1.0<br>(Ref)      | 1.0<br>(Ref)      | 1.0<br>(Ref)      |

|                       |                                      |                   |                   |                   |                   |                   |
|-----------------------|--------------------------------------|-------------------|-------------------|-------------------|-------------------|-------------------|
|                       | Warrant or officer                   | 0.8<br>(0.6-1.0)  | 0.6†<br>(0.5-0.8) | 0.8†<br>(0.7-0.9) | 0.8*<br>(0.7-0.8) | 0.8*<br>(0.7-0.9) |
| Injury mechanism      | Blast only                           | 2.5†<br>(1.3-4.7) | 1.5<br>(0.9-2.5)  | 1.4†<br>(1.1-1.7) | 1.4†<br>(1.1-1.7) | 1.3†<br>(1.1-1.6) |
|                       | Non-blast only                       | 2.3†<br>(1.2-4.4) | 1.3<br>(0.8-2.2)  | 1.2<br>(1.0-1.5)  | 1.2<br>(1.0-1.5)  | 1.3†<br>(1.1-1.5) |
|                       | Both blast and non-blast             | 2.9†<br>(1.5-5.4) | 2.0†<br>(1.2-3.3) | 1.6*<br>(1.3-2.0) | 1.7*<br>(1.4-2.1) | 1.7*<br>(1.4-2.0) |
|                       | Neither                              | 1.0<br>(Ref)      | 1.0<br>(Ref)      | 1.0<br>(Ref)      | 1.0<br>(Ref)      | 1.0<br>(Ref)      |
| Other TBI experiences | TBI before deployment only           | 0.8*<br>(0.7-0.9) | 0.9<br>(0.8-1.0)  | 0.8*<br>(0.8-0.9) | 0.8*<br>(0.8-0.9) | 0.9*<br>(0.9-0.9) |
|                       | TBI after deployment only            | 1.4*<br>(1.2-1.7) | 1.4*<br>(1.2-1.6) | 1.2*<br>(1.1-1.3) | 1.2*<br>(1.1-1.3) | 1.3*<br>(1.2-1.4) |
|                       | TBI both before and after deployment | 1.5*<br>(1.3-1.9) | 1.3†<br>(1.1-1.6) | 1.1<br>(1.0-1.2)  | 1.1†<br>(1.0-1.3) | 1.1<br>(1.0-1.1)  |
|                       | No TBI history                       | 1.0<br>(Ref)      | 1.0<br>(Ref)      | 1.0<br>(Ref)      | 1.0<br>(Ref)      | 1.0<br>(Ref)      |

†p<0.01

\*p<0.0001

OR: odds ratio

CI: confidence interval

Ref: Reference group

TBI: Traumatic brain injury

CTBIE: Comprehensive Traumatic Brain Injury Evaluation; the examination conducted by the VA that includes the Neurobehavioral Symptom Inventory

Supplemental Digital Content 3: Table. Sensitivity analysis: Logistic regression results estimating the association between Neurobehavioral Symptom Inventory (NSI) subscale scores and group membership, among Veterans whose Validity-10 score was <22<sup>1</sup>.

| Comorbidity Phenotype        | Severe or Very Severe Symptoms<br>(Average Scaled NSI Score ≥3) |                   |                   |                   |                   |
|------------------------------|-----------------------------------------------------------------|-------------------|-------------------|-------------------|-------------------|
|                              | Vestibular                                                      | Somato-sensory    | Cognitive         | Affective         | Interference      |
|                              | OR<br>(95%CI)                                                   | OR<br>(95%CI)     | OR<br>(95%CI)     | OR<br>(95%CI)     | OR<br>(95%CI)     |
| Moderately Healthy           | 1.0<br>(Ref)                                                    | 1.0<br>(Ref)      | 1.0<br>(Ref)      | 1.0<br>(Ref)      | 1.0<br>(Ref)      |
| Moderately Healthy + Decline | 1.3<br>(0.9-1.8)                                                | 1.6<br>(1.0-2.5)  | 1.8*<br>(1.7-1.9) | 2.0*<br>(1.9-2.2) | 1.9*<br>(1.8-2.0) |
| Polytrauma + Improvement     | 1.0<br>(0.7-1.4)                                                | 1.0<br>(0.6-1.8)  | 1.3*<br>(1.2-1.3) | 1.3*<br>(1.2-1.4) | 1.3*<br>(1.3-1.4) |
| Polytrauma Phenotype         | 2.0*<br>(1.4-2.8)                                               | 2.1*<br>(1.2-3.5) | 2.7*<br>(2.5-2.9) | 3.3*<br>(3.1-3.5) | 2.8*<br>(2.7-3.0) |
| Mental Health                | 0.9<br>(0.7-1.4)                                                | 0.9<br>(0.5-1.6)  | 2.1*<br>(2.0-2.3) | 2.7*<br>(2.6-2.9) | 2.1*<br>(2.0-2.2) |

\*p<0.0001

OR: odds ratio

CI: confidence interval

Ref: Reference group

All models are adjusted for: age group at the time of NSI (30-39, 40-49, 50-59, 60-69 years), race/ethnicity (white, non-Hispanic; black, non-Hispanic; Asian, non-Hispanic; Native American or Pacific Islander, non-Hispanic; Hispanic; unknown), sex (men, women), educational attainment (less than high school, high school or equivalent, some college, college graduate or graduate degree), marital status (married or not), service branch (Air Force, Army, Coast Guard or Navy, Marines), component (active duty, National Guard or Reserve), rank (enlisted, warrant or officer), injury mechanism (blast only, non-blast only, blast and non-blast), and other TBI history (no other TBI, other TBI pre-deployment, other TBI post-deployment, other TBI both pre- and post-deployment). Colors indicate magnitude of difference between Moderately Healthy Veterans and comparison group. Green represents similar (OR: 0.7-1.4), yellow indicates small differences (OR: 1.5-1.9), light red indicates moderate differences (OR: 2.0-2.4), and dark red indicates large differences (OR: 2.5 or higher).

<sup>1</sup> Validity-10 represents a subset of symptoms considered to be uncommon among respondents and high scores on these items may suggest symptom over-reporting. The
